# Supplementary material for: Effectiveness and safety of beta blockers in the management of hypertension in older adults: a systematic review to help reduce inappropriate prescribing
Source: BMC Geriatr. 2017 Oct 16;17(Suppl 1):224. doi: 10.1186/s12877-017-0575-4 (PMC5647554; doi:10.1186/s12877-017-0575-4)
Supplement: Supplementary file 3 — List of excluded studies. (XLSX 46 kb) [file 12877_2017_575_MOESM3_ESM.xlsx]

## Sheet: Excluded list
Additional File 3: List of excluded studies
No.	Author/year	Title/Journal	Accession number/PMCID	Exclusion reason	Search
1	Ahmad 2014	Comparative effect of antihypertensive therapy on blood glucose level in hypertensive patients in an Indian population	24132701	Wrong population, less than 80% > 65.	3B
2	Andrawes 2005	Prevention of cardiovascular events in elderly people	16245959	Wrong intervention/topic, summarized effect of antihypertensives treatment (mixed). No relevant data about beta blocker. Wrong publication type, this review does not follow the criteria for a systematic review (no method section, limited data base search, no quality appraisal and so on).	2
3	ANZHFRCG 1997	Australia/New Zealand Heart Failure Research Collaborative Group (ANZHFRCG). Randomised, placebo-controlled trial of carvedilol in patients with congestive heart failure due to ischaemic heart disease. Lancet 1997;349:375-80	9033462	Wrong population, patients with heart failure, does not deal with beta blockers.	3A
4	Applegate 1989	Hypertension in elderly patients	2655523	Wrong population, mean age <65 years. Wrong intervention, does not deal with beta blockers (Only one trial but deals with diastolic hypertension).	2
5	Aronow 1997	Effect of propranolol versus no propranolol on total mortality plus nonfatal myocardial infarction in older patients. Am J Cardiol 1997;80:207-9	9230162	Wrong population, not all had hypertension.	3A
6	Aronow 2011	Office management of hypertension in older persons. American Journal of Medicine 124(6): 498-50	21605724	Wrong publication type, narrative.	3B
7	Bakris 2014	Dual Therapy in Hypertensive Patients with Coronary Artery Disease: The Role of Calcium Channel Blockers and beta-Blockers	19845074	Wrong population, mean age <65 years, no subgroup elderly.	3B
8	Bangalore 2007	A meta-analysis of 94,492 patients with hypertension treated with beta blockers to determine the risk of new-onset diabetes mellitus	17920367/10.1016/j.amjcard.2007.05.057	Wrong intervention, topic diabetes mellitus. Wrong population, subgroup population >60 years, not >65.	1
9	Bangalore 2007	Cardiovascular protection using beta-blockers: a critical review of the evidence	17692739/10.1016/j.jacc.2007.04.060	Wrong population, age not stated. Wrong outcome, risk of beta blockers in the risk of developing Diabetes mellitus.	2
10	Bangalore 2008	Beta-blockers for primary prevention of heart failure in patients with hypertension: insights from a meta-analysis	18848139/10.1016/j.jacc.2008.05.057	Wrong population, mean age <65 years (no subgroup analysis targeting elderly). Wrong outcome, evaluates the role of heart rate reduction with beta blockers on the risk with cardiovascular events.	1
11	Bangalore 2008	Relation of beta-blocker-induced heart rate lowering and cardioprotection in hypertension	19017516/10.1016/j.jacc.2008.06.048	Wrong population, mean age <65 years. Wrong intervention/topic, not dealing with beta blockers.	1
12	Bangalore 2015	Outcomes with Angiotensin-converting Enzyme Inhibitors vs Other Antihypertensive Agents in Hypertensive Blacks	26071821	Wrong population, mean age <65 years, no subgroup elderly.	3B
13	Barron 2011	Beta blockers and breast cancer mortality: a population- based study.	21632503	Wrong population: not clear if beta blockers for hypertension, women with breast cancer.	3B
14	Beard 1992	Management of elderly patients with sustained hypertension	0.716386	Wrong population, mean age is not clear. Wrong intervention, not all included studies deal with beta blockers and it is not clear if there is a summerized effect of different antihypertensives. Wrong publication type, narrative review.	2
15	Bejan-Angoulvant 2010	Treatment of hypertension in patients 80 years and older: The lower the better? A meta-analysis of randomized controlled trials	20574244/10.1097/HJH.0b013e328339f9c5	Wrong intervention, antihypertensive treatment in general. Only summarized results for antihypertensives.	2
16	Benetos 2015	Polypharmacy in the Aging Patient Management of Hypertension in Octogenarians.	26172896/10.1001/jama.2015.7517	Wrong intervention, medication group under study is not included.	Update (S1+2)
17	Beto 1992	Quality of life in treatment of hypertension. A metaanalysis of clinical trials	1349484	Wrong population, mean age <65 years. A few trials deal with beta blockers but the age criteria are not fulfilled.	2
18	Bi 2012	Effects of beta-blocker use on volume status in hemodialysis patients	22699805	Wrong population, less than 80% > 65.	3B
19	Black HR 2003	Principal results of the Controlled Onset Verapamil Investigation of Cardiovascular End Points (CONVINCE) Trial	12709465/10.1001/jama.289.16.2073	Wrong intervention, eighter HCT or Atenolol, no subgroup analysis for Atenolol control group.	3A
20	Bocchi 2015	Effect of Combining Ivabradine and beta-Blockers: Focus on the Use of Carvedilol in the SHIFT Population	25968495	Wrong population, mean age <65 years, not all participants with hypertension.	3B
21	Bouchard 2011	Statin in combination with beta-blocker therapy reduces postoperative stroke after coronary artery bypass graft surgery.	21352973	Wrong population, only about 60% with hypertension.	3B
22	Briasoulis 2014	Effects of antihypertensive treatment in patients over 65 years of age: a meta-analysis of randomised controlled studies.	23813846/10.1136/heartjnl-2013-304111	Wrong intervention/topic, summarized effect of antihypertensive treatment (mixed). No relevant data about beta blockers.	Update (S1+2)
23	Bronsert 2013	Comparative effectiveness of antihypertensive therapeutic classes and treatment strategies in the initiation of therapy in primary care patients: a Distributed Ambulatory Research in Therapeutics Network (DARTNet) study	24004705	Wrong population, less than 80% > 65.	3B
24	Canavan 2015	Does Lowering Blood Pressure With Antihypertensive Therapy Preserve Independence in Activities of Daily Living? A Systematic Review.	25156624/10.1093/ajh/hpu131	Wrong population, mean age <65 years. Wrong intervention, not beta blocker specific.	Update (S1+2)
25	Carlberg 2004	Atenolol in hypertension: Is it a wise choice?	15530629/10.1016/S0140-6736(04)17355-8	Wrong population, mean age <65 years, no subgroup elderly.	2
26	Carr 2012	Long-term follow-up of mrc hypertension trial in older adults and lack of impact of glycaemic change on outcomes	doi: 10.1097/01.hjh.0000420291.29036.f3	Wrong publication type, conference abstract.	3B
27	Casiglia 1994	Effect of two different therapeutic approaches on total and cardiovascular mortality in a Cardiovascular Study in the Elderly (CASTEL).	7830324	Wrong intervention, analysis was not done for atenolol separately.	3A
28	Chang Quang 2011	The association of antihypertensive medication use with risk of cognitive decline and dementia: a meta-analysis of longitudinal studies	22093537/10.1111/j.1742-1241.2011.02810.x	Wrong population, mean age <65 years.	1
29	Charpentier 2011	Treating hypertension in the very elderly Manejo de hipertension en pacientes ancianos	21852597/10.1345/aph.1P791	Wrong intervention/topic, no subgroup analysis for beta blockers.	2
30	Chen 2010a	Calcium channel blockers versus other classes of drugs for hypertension	20687074/10.1002/14651858.CD003654.pub4	Wrong population, mean age not stated.	1
31	Chen 2010b	Blood pressure lowering efficacy of beta-blockers as second-line therapy for primary hypertension	20091622/10.1002/14651858.CD007185.pub2	Wrong population, mean age <65 years (no subgroup analysis targeting elderly).	2
32	Chen 2013	The effects of calcium channel blockers in the prevention of stroke in adults with hypertension: a meta-analysis of data from 273,543 participants in 31 randomized controlled trials	23483932/3590278/10.1371/journal.pone.0057854	Wrong population, mean age <65 years. Only 1 of the 16 trials comparing calcium channel blockers with beta blockers fullfill the age criteria. The other trials compare calcium channel blockers with beta blockers and diuretics.	2
33	Cheung 2006	Meta-analysis of large outcome trials of angiotensin receptor blockers in hypertension	16121197/10.1038/sj.jhh.1001931	Wrong population, mean age <65 years. Wrong intervention, 1 of the 3 included trials deals with beta blockers.	2
34	Cohen 2011	Update on pathophysiology and treatment of hypertension in the elderly. Current Hypertension Reports 13(5): 330-33	21681384	Wrong publication type.	3B
35	Croog 1994	Effects of antihypertensive medications on quality of life in elderly hypertensive women	8031548	Other: HCT was added when BP was not contolled.	2
36	Curb 1996	Effect of diuretic based antihypertensive treatment on cardiovascular disease risk in older diabetic patients with isolated systolic hypertension	8968014	Wrong intervention, analysis was not done per type of treatment (chlorthalidone+beta blocker/chlorthalidone+reserpine).	3A
37	Dahlöf 1991	Morbidity and mortality in the Swedish Trial in Old Patients with Hypertension (STOP-Hypertension)	1682683	Wrong intervention, treatment was a mixed of patients under beta blockers and diuretics.	3A
38	Dahlöf 2002	Cardiovascular morbidity and mortality in the Losartan Intervention For Endpoint reduction in hypertension study (LIFE): a randomised trial against atenolol. Lancet 2002; 359:995–1003.	11937178	Wrong population, less than 80% <65 years. Losartan 66,9 (SD 7,0) = 61 % of the population ≥ 65 years Atenolol 66,9 (SD 7,0) = 61 % of the population ≥ 65 years All 66,9 (SD 7,0) = 61 % of the population ≥ 65 years	ref check
39	Dahlöf 2005	Prevention of cardiovascular events with an antihypertensive regimen of amlodipine adding perindopril as required versus atenolol adding bendroflumethiazide as required, in the Anglo-Scandinavian Cardiac Outcomes Trial-Blood Pressure Lowering Arm (ASCOT-BPLA): a multicentre randomised controlled trial. Lancet 2005; 366:895–906.	16154016	Wrong population, less than 80% >65 years, only subgroup for >60 years.	ref check
40	Darowski 2011	Cardiovascular medication and falls	10.1017/S0959259810000353	Wrong population, mean age <65 years (no subgroup analysis targeting elderly).	2
41	Davis 1998	Risk factors for stroke and type of stroke in persons with isolated systolic hypertension	9660383	Wrong intervention, atenolol just one step of medication in the intervention group (+ Chlorthalidone , reserpine).	3A
42	De Backer 2013	Effect of antihypertensive therapy on SCORE-estimated total cardiovascular risk: Results from an open-label, multinational investigation - The POWER survey	23997946/3745839/10.1155/2013/165789	Wrong publication type, open-label, postmarketing surveillance study.	2
43	De Giorgi 2013	Effect of beta-blockers and other antihypertensive drugs on the risk of melanoma recurrence and death	24182700	Wrong population, less than 80% > 65.
44	Deedwania 2013	Effects of Add-On Nebivolol on Blood Pressure and Glucose Parameters in Hypertensive Patients With Prediabetes	23551727	Wrong population, less than 80% > 65.	3B
45	DeLeeuw 2002	The effects of calcium channel blockers on cardiovascular outcomes: a review of randomised controlled trials	12035874	Wrong intervention/topic, calcium channel blockers.	1
46	DeLima 2013	Beta-blockers for preventing stroke recurrence	23728669/10.1002/14651858.CD007890.pub2	Wrong population and topic, the review focuses on the efficacy of beta blockers for preventing stroke recurrents in patients who already had stroke or TIA.	1
47	Devereux 2004	Regression of hypertensive left ventricular hypertrophy by losartan compared with atenolol: the Losartan Intervention for Endpoint Reduction in Hypertension (LIFE) trial. Circulation 2004; 110:1456–1462.	15326072	Wrong outcome: left ventricular mass index.	ref check
48	Devereux 2015	Left Ventricular Wall Stress-Mass-Heart Rate Product and Cardiovascular Events in Treated Hypertensive Patients: LIFE Study	26418019	Wrong population, mean age <65 years, no subgroup elderly.	3B
49	Devi 2011	Effect of fixed dose combinations of metoprolol and amlodipine in essential hypertension: MARS A randomized controlled trial." Blood Pressure 20(SUPPL. 2): 5-12	22352120	Wrong population, mean age <65 years, no subgroup elderly.	3B
50	Diao 2013	Pharmacotherapy for mild hypertension	22895954/10.1002/14651858.CD006742.pub2	Wrong population, in 3 of 4 included trials the age criteria was not fulfilled. (mean age <65 years).	1
51	Dickinson 2009	Relaxation therapies for the management of primary hypertension in adults	18548088/10.1038/jhh.2008.65	Wrong population/topic, mean age <65 years.	1
52	Diehm 2011	Effect of nebivolol vs. hydrochlorothiazide on the walking capacity in hypertensive patients with intermittent claudication. Journal of Hypertension 29(7): 1448-1456	21602713	Wrong population, only 52% over 65 years.	3B
53	Ding 2013	Impact of heart rate on central hemodynamics and stroke: a meta-analysis of beta-blocker trials	23382335/10.1093/ajh/hps003	Wrong intervention/topic, antihypertensive treatment in general. Wrong outcome, trials deal with central systolic BP and augmentation index and with these results they investigate the risk of stroke. Wrong population, Only 2 of 9 included trials fullfill the age criteria.	2
54	Dobarro 2013	Propranolol restores cognitive deficits and improves amyloid and Tau pathologies in a senescence-accelerated mouse model	22824191	Wrong population (mouse model).	3B
55	Dornbrook-Lavender 2003	Primary Prevention of Coronary Heart Disease in the Elderly	14565805/10.1345/aph.1D025	Wrong intervention/topic, not dealing with beta blockers specific.	2
56	Doughty 2003	The survival of patients with heart failure with preserved or reduced left ventricular ejection fraction: An individual patient data meta-analysis: Meta-analysis Global Group in Chronic Heart Failure (MAGGIC)	12882995/10.1152/japplphysiol.00441.2003	Wrong intervention/topic, not dealing with beta blockers specific.	2
57	Dutch TIA 1993	Trial of secondary prevention with atenolol after transient ischemic attack or nondisabling ischemic stroke	8465360	Wrong population, mean age <65 years, (66 Atenolol, 62 Placebo of 1473 Patients).	3A
58	Elliot 2007	Incident diabetes in clinical trials of antihypertensive drugs: a network meta-analysis. Lancet 2007; 369:201–207.	17240286	Wrong population, mean age <65 years.	ref check
59	Engineer 2013	Exposure to ACEI/ARB and beta-blockers is associated with improved survival and decreased tumor progression and hospitalizations in patients with advanced colon cancer	PMCID: PMC3799196	Wrong population, not all with hypertension.	3B
60	Eriksson 1995	Atenolol in secondary prevention after stroke	DOI:10.1159/000107813	Wrong population, not 80% >65 years.	3A
61	Espinola-Klein 2011	Beta-Blockers in patients with intermittent claudication and arterial hypertension: Results from the nebivolol or metoprolol in arterial occlusive disease trial. Hypertension 58(2): 148-154	21646599	Wrong population, not 80% >65 years.	3B
62	Fang 2014	The efficacy and safety of arotinolol combined with a different calcium channel blocker in the treatment of Chinese patients with essential hypertension: a one-year follow-up study	24678807	Wrong intervention (beta blockers basis for all group of patients).	3B
63	Fletcher 1993	Mortality and atenolol treatment. Brit Med J. 1993; 306: 622-623.	8461813	Wrong population, mean age <65 years.	ref check
64	Funck-Brentano 2011	Influence of order and type of drug (bisoprolol vs. enalapril) on outcome and adverse events in patients with chronic heart failure: A post hoc analysis of the CIBIS-III trial. European Journal of Heart Failure 13(7): 765-772	21551161	Wrong population, patients with CHF, not all had hypertension.	3B
65	Fyhrquist 2005	Pulse pressure and effects of losartan or atenolol in patients with hypertension and left ventricular hypertrophy. Hypertension 2005; 45:580–585.	15790960	Wrong population, mean age <65 years.	ref check
66	Galindo-Ocana 2012	Effects of renin-angiotensin blockers/inhibitors and statins on mortality and functional impairment in polypathological patients	DOI: 10.1016/j.ejim.2011.06.004	Wrong population, not clear if all patients with beta- blockers have hypertension (probably not).	3B
67	Ghiadoni 2011	Perindopril for the treatment of hypertension	21599567/10.1517/14656566.2011.585460	Wrong intervention/topic, dealing with antihypertensive treatment in general. Wrong population, mean age <65 years. Wrong publication type, narrative review.	2
68	Giles 2014	Efficacy and safety of nebivolol and valsartan as fixed-dose combination in hypertension: a randomised, multicentre study	24881993	Wrong topic (subroup age without results for beta blockers vs. other therapy).	3B
69	Glover 1990	Overview of clinical trials of dilevalol in essential hypertension	2142508	Wrong population, mean age <65 years, >65 Years only 19%. Wrong publication type, narrative review.	2
70	Goldberg 1995	Safety and tolerability of losartan compared with atenolol, felodipine and angiotensin converting enzyme inhibitors	18800461	Wrong publication type, report (narrativ review).	2
71	Gores 2014	Pharmacotherapy for Hypertension in Older Adults: A Systematic Review.	25323058/10.1007/s40266-014-0219-8	Wrong population, mean age <65 years, no subgroup analysis available.	Update (S1+2)
72	Greve 2012	Contrasting hemodynamic mechanisms of losartan- vs. atenolol-based antihypertensive treatment: a LIFE study	22695506	Wrong population, less than 80% > 65.	3B
73	Grossman 2001	Meta-analyses of antihypertensive therapy: Are some of them misleading?	11551371	Wrong intervention/topic, not specific for beta blockers.Wrong population, mean age <65 years.	2
74	Gueyffier 1996	New meta-analysis of treatment trials of hypertension: improving the estimate of therapeutic benefit.	8642184	Wrong intervention/ population, no subgroups on beta blockers analysed. Two pepers included with our age target group and beta blocker ( = MRC1992 and Dahlof1991).	1
75	Gueyffier 1997	Effect of antihypertensive drug treatment on cardiovascular outcomes in women and men. A meta-analysis of individual patient data from randomized, controlled trials. The INDANA Investigators	9148648	Wrong intervention/topic, not specific for beta blockers. Wrong population, age generally >60.	2
76	Gueyffier 1999	Antihypertensive drugs in very old people: a subgroup meta-analysis of randomised controlled trials. INDANA Group	10459960	Wrong intervention - no beta blockers subgroup analysis.	3A
77	Hadjiev 2008	Antihypertensive treatment in elderly hypertensives without a history of stroke and the risk of cognitive disorders	18336621/10.1111/j.1600-0404.2008.01001.x	Wrong publication type, narrative review. Wrong intervention/topic, summarized effect of antihypertensivestreatment (mixed). No relevant data about beta blockers.	2
78	Hajjar 2005	Cross-Sectional and Longitudinal Association Between Antihypertensive Medications and Cognitive Impairment in an Elderly Population	15741285	Wrong population, not all patients had hypertension.	ref check
79	Hajjar 2012	Effect of antihypertensive therapy on cognitive function in early executive cognitive impairment: a double-blind randomized clinical trial.	doi: 10.1001/archinternmed.2011.1391	Wrong intervention.	ref check
80	Hansson 1999a	Effect of angiotensinconverting-enzyme inhibition compared with conventional therapy on cardiovascular morbidity and mortality in hypertension: the Captopril Prevention Project (CAPPP) randomised trial. Lancet 1999; 353: 611–16	10030325	Wrong population, mean age <65 years.	3A
81	Hansson 1999b	Randomised trial of old and new antihypertensive drugs in elderly patients: cardiovascular mortality and morbidity the Swedish Trial in Old Patients with Hypertension-2 study.	10577635	Wrong intervention, beta blockers not separately anlaysed.	3A
82	Hansson 2000	Randomised trial of effects of calcium antagonists compared with diuretics and β-blockers on cardiovascular morbidity and mortality in hypertension: The Nordic Diltiazem (NORDIL) study. Lancet 2000; 356: 359–65.	10972367	Wrong population, mean age <65 years, wrong intervention.	3A
83	Hebert 2011	Prevalence of stroke in systolic heart failure. Journal of Cardiac Failure 17(1): 76-81	21187266	Wrong population, not all had hypertension.	3B
84	Herrin 2013	Combination antihypertensive therapy among patients with COPD	23287970	Wrong population, less than 80% > 65, different combinations (no single beta blocker therapy).	3B
85	Hillemann 1999	Fixed-dose combination vs monotherapy in hypertension: a meta-analysis evaluation	10449213	Wrong population > 60 years were exluded.	1
86	Hoes 1995	Does drug treatment improve survival: reconciling the trials in mild-to-moderate hypertension	7594445	Wrong population, mean age <65 years.	1
87	Hsu 2001	Does treatment of non-malignant hypertension reduce the incidence of renal dysfunction: a meta-analysis of 10 randomised, controlled trials	11317188/10.1038/sj.jhh.1001128	Wrong population, mean age <65 years (range 44-72 years, no subgroups).	1
88	Ibsen 2004	Does albuminuria predict cardiovascular outcome on treatment with losartan versus atenolol in hypertension with left ventricular hypertrophy? A LIFE substudy. J Hypertens 2004; 22:1805–1811.	15311110	Wrong population, less than 80% > 65, SD not reported. LIFE population is not 80% >65 years according to other articles.	ref check
89	Ignacio 2002	Is the verdict out? A systematic review of pharmacotherapy for hypertension in the elderly	12110081	Wrong population, age > 60 years. Mean age not stated.	2
90	Iizuka 2011	Artist tablets (carvedilol) for hypertensive patients in Japan: results of a long-term special survey. Drugs in R & D 11(2): 191-205	21679008	Wrong population, mean age <65 years.	3B
91	Inrid 2012	Probing the mechanisms of intradialytic hypertension: A pilot study targeting endothelial cell dysfunction	22700888	Wrong population, less than 80% > 65.	3B
92	Insua 1994	Drug treatment of hypertension in the elderly: A meta-analysis	7726892	Wrong intervention/topic, antihypertensive treatment in general. Wrong population, age >60 years.	2
93	Iseki 2013	Effects of angiotensin receptor blockade (ARB) on mortality and cardiovascular outcomes in patients with long-term haemodialysis: A randomized controlled trial	23355629	Wrong population, mean age <65 years, no specific beta blocker control group, no subgroup for both (age, beta blocker).	3B
94	Kageyama 2012	Optimal Combination of Effective ANtihypertensives (OCEAN) study: a prospective, randomized, open-label, blinded endpoint trial--rationale, design and results of a pilot study in Japan	22089534	Wrong population, less than 80% > 65.	3B
95	Khachaturian 2006	Antihypertensive medication use and incident Alzheimer disease: the Cache County Study.	16533956	Wrong population, not all patients had hypertension.	ref check
96	Khan 2007	The 2007 Canadian Hypertension Education Program recommendations for the management of hypertension: Part 2 - Therapy	6.61489	Wrong publication type, education program.	2
97	Kostis 2014	Visit-to-visit blood pressure variability and cardiovascular death in the Systolic Hypertension in the Elderly Program	24325609	Wrong intervention/topic analysis of VVV.	3B
98	Krum 2011	Effect on Mode of Death of Heart Failure Treatment Started with Bisoprolol Followed by Enalapril, Compared to the Opposite Order: Results of the Randomized CIBIS III Trial. Cardiovascular therapeutics 29(2): 89-98	20528880	Wrong population, patients with heart failure, not all had hypertension.	3B
99	Kumolosasi 2012	Effectiveness of antihypertensive drugs in hypertensive patients with end stage renal failure	23082445	Wrong population, less than 80% > 65.	3B
100	Kuyper 2014	Systematic Review/Meta-analysis Atenolol vs Nonatenolol b -Blockers for the Treatment of Hypertension: A Meta-analysis.	24750981/10.1016/j.cjca.2014.01.006	Wrong population, unsufficient information about age and inclusion of papers for >60years.	Update (S1+2)
101	Larochelle 2014	Review b -Blockers in Hypertension: Studies and Meta-analyses Over the Years.	24750978/10.1016/j.cjca.2014.02.012	Wrong publication type, narrative review.	Update (S1+2)
102	Larstorp 2011	Changes in electrocardiographic left ventricular hypertrophy and risk of major cardiovascular events in isolated systolic hypertension: The LIFE study. Journal of Human Hypertension 25(3): 178-185	20505749	Wrong population, substudy about Sokolow-Lyon Voltage vs. Cornell Product.	3B
103	Larstorp 2012	Regression of ECG-LVH is associated with lower risk of new-onset heart failure and mortality in patients with isolated systolic hypertension; The life study	22717544	Wrong intervention.	3B
104	Law 2009	Use of blood pressure lowering drugs in the prevention of cardiovascular disease: Meta-analysis of 147 randomised trials in the context of expectations from prospective epidemiological studies	19476581/10.1111/j.1751-7141.2008.00018.x	Wrong intervention/topic, antihypertensive treatment in general. Wrong outcome, blood pressure lowering.	2
105	Leonetti 2009	Arterial hypertension as a risk factor in the elderly and its treatment	1534363; 1992	Wrong publication type, narrative review.	2
106	Leslie 2007	Weight gain as an adverse effect of some commonly prescribed drugs: a systematic review	17566010/10.1093/qjmed/hcm044	Wrong population, participants aged over 18 years old that had been prescribed a drug considered obesogenic were eligible for inclusion.	1
107	Levine 1994	Treatment of hypertension in the elderly	7859234	Wrong intervention/topic, summarized effect of antihypertensive treatment (mixed). No relevant data about beta blocker.	2
108	Lewin 2012	Nebivolol withdrawal results in blood pressure returning toward pretreatment levels, but without rebound symptoms: phase IV randomized trial	22421631	Wrong population, less than 80% > 65.	3B
109	Li 2011	Improvement of hypertension and LVH in maintenance hemodialysis patients treated with sustained-release isosorbide mononitrate. Journal of Nephrology 24(2): 236-245	21240870	Wrong population, mean age <65 years, wrong intervention.	3B
110	Lievre 1995	Treatment of high blood pressure in patients aged over 60 years: lessons from randomized clinical trials		Wrong intervention, treatment mixed drugs.	1
111	Lindholm 1996	The Swedish Trial in old patients with hypertension-2 (STOP-hypertension-2): a progress report	8879603	Wrong publication type, progress report.	3A
112	Lindholm 2005	Should beta blockers remain first choice in the treatment of primary hypertension: a meta-analysis	16257341/10.1016/S0140-6736(05)67573-3	Wrong population, age range 45-76 years, no subgroup analysis on elderly (≥65 years).	1
113	Lobmeyer 2011	Polymorphisms in genes coding for GRK2 and GRK5 and response differences in antihypertensive-treated patients. Pharmacogenetics and Genomics 21(1): 42-49	21127457	Wrong intervention/topic.	3B
114	Lonnebakken 2011	In-treatment stroke volume predicts cardiovascular risk in hypertension." Journal of Hypertension 29(8): 1508-1514	21720264	Wrong population, substudy about stroke-volume.	3B
115	Mairesse 2011	Focus on beta-blockers for vascular specialists in 2012	22093805/10.1016/j.jmv.2011.10.001	Wrong intervention/ topic, vascular disease.	2
116	Mangoni 2005	Cardiovascular drug therapy in elderly patients: Specific age-related pharmacokinetic, pharmacodynamic and therapeutic considerations	16323970	Wrong intervention/ topic, cardiovascular drugs- pharmacocinetics/-dynamics.	2
117	Marott 2014	Antihypertensive treatment and risk of atrial fibrillation: a nationwide study	24347316	Wrong population, mean age <65 years, not all had hypertension.	3B
118	Martsevich 2012	Comparison of the influence of long-term treatment based on carvedilol or bisoprolol on metabolic parameters in hypertensive patients with overweight or obesity results of the randomized open-label parallel-groups stepped trial cabriolet (part I)	DOI: /10.20996/1819-6446-2012-8-4-488-499	Wrong population, mean age <65 years, article in Russian.	3B
119	Matchar 2008	Systematic review: comparative effectiveness of angiotensin-converting enzyme inhibitors and angiotensin II receptor blockers for treating essential hypertension	17984484	Wrong population, mean age <65 years (no subgroups analysed).	1
120	Matsuoka 2013	Comparison of efficacy and safety between bisoprolol transdermal patch (TY-0201) and bisoprolol fumarate oral formulation in Japanese patients with grade I or II essential hypertension: randomized, double-blind, placebo-controlled study	24119112	Wrong population, mean age <65 years, no subgroup for age, ref 38 interesting.	3B
121	Mc Gory 2005	A meta-analysis of perioperative beta blockade: what is the actual risk reduction?	16153424/10.1016/j.surg.2005.03.022	Wrong publication type, structured abstract. Wrong population, mean age 63-76.	1
122	Mc Neely 1995	Nebivolol in the management of essential hypertension: a review	10235696	Wrong population, mean age <65 years.	1
123	McGuinnes 2009	Blood pressure lowering in patients without prior cerebrovascular disease for prevention of cognitive impairment and dementia	19821318/10.1002/14651858.CD004034.pub3	Wrong intervention, the analysis assesses the combined effect of all antihypertensives.	1
124	Meredith 2004	A putative placebo comparison of the SCOPE and LIFE trials	15295716/10.3317/jraas.2004.011	Wrong publication type, narrative review.	2
125	Messerli 1998	Are beta-blockers efficacious as first-line therapy for hypertension in the elderly: a systematic review	9634263	Wrong population, population >60, no information >80% over 65.	1
126	Messerli 2015	Efﬁcacy and Safety of Calcium Channel Blocker/Diuretics Combination Therapy in Hypertensive Patients: A Meta-Analysis.	25556777/10.1111/jch.12462	Wrong population, mean age <65 years. Wrong intervention (not beta blocker specific).	Update (S1+2)
127	Miall 1990	Beta-blockers vs. thiazides in the treatment of hypertension: a review of the experience of the large national trials	11527138	Wrong population, mean age <65 years.	2
128	Montero 2013	Systemic beta-blockers may reduce the need for repeated intravitreal injections in patients with wet age-related macular degeneration treated by bevacizumab	23099497	Wrong population, patients with macular degeneration (eye).	3B
129	Mori 2011	Artist tablets (carvedilol) for hypertensive patients in Japan: results of a drug use survey. Drugs in R & D 11(2): 171-190	21679007	Other: not in line with PICO scheme, no control group.	3B
130	Mulrow 1994	Hypertension in the elderly: implications and generalizability of randomized trials	7990246	Wrong population, mean age <65 years, Wrong topic, no relevant data about beta blocker.	1
131	Mulrow 2000	Pharmacotherapy for hypertension in the elderly	10796688/10.1002/14651858.CD000028	Wrong intervention/topic, not specific on the effect of beta blocker. Summary effect of different antihypertensive treatments.	2
132	Musini 2010	Pharmacotherapy for hypertension in the elderly	19821263/10.1002/14651858.CD000028.pub2; 2009	Wrong intervention, does not deal with beta blockers.	1
133	Naderi 2012	Adherence to drugs that prevent cardiovascular disease: meta-analysis on 376,162 patients	22748400/10.1016/j.amjmed.2011.12.013	Wrong intervention, adherence to therapy. Wrong population, mean age <65 year ( no subgroup analysis on aged participants).	1
134	Neutel 2014	Long-term safety of nebivolol and valsartan combination therapy in patients with hypertension: an open-label, single-arm, multicenter study	25492835	Wrong population, mean age <65 years, no subgroup elderly.	3B
135	NHF Aust 1981	Report dy the Managemen- Commi tee of the National Heart Foundation of Australia. Treatment of mild hypertension in the elderly. Med J Aust. 1981; 2: 398-402.	7033745	Wrong intervention: no beta blocker.	ref check
136	Nilsson 2005	Reducing the risk of stroke in elderly patients with hypertension: A critical review of the efficacy of antihypertensive drugs	15974641	Wrong publication type, critical review.	2
137	Ogihara 2012	Combination therapy for hypertension in the elderly: a sub-analysis of the Combination Therapy of Hypertension to Prevent Cardiovascular Events (COPE) Trial.	22278623/10.1038/hr.2011.216	Wrong intervention, this trail aimed to explore the optimal CCB benidipine-based combination therapy in terms of lowering blood pressure and preventing.	Update (3A)
138	Okin 2011a	Racial differences in incident heart failure during antihypertensive therapy	21304095	Wrong intervention.	3B
139	Okin 2011b	Serial assessment of the electrocardiographic strain pattern for prediction of new-onset heart failure during antihypertensive treatment: the LIFE study	21239405	Wrong intervention.	3B
140	Okin 2012	Racial differences in sudden cardiac death among hypertensive patients during antihypertensive therapy: the LIFE study	22079554	Wrong intervention, wrong topic.	3B
141	Olsen 2011	Changes in subclinical organ damage vs. in Framingham risk score for assessing cardiovascular risk reduction during continued antihypertensive treatment: a LIFE substudy. J Hypertens 2011; 29:997–1004.	21358415	Wrong population, not 80% >65years.	ref check
142	Oparil 2000	Calcium antagonists in cardiovascular disease: Clinical evidence from morbidity and mortality trials. [French] Les inhibiteurs calciques dans les affections cardiovasculaires: Donnees cliniques issues des etudes de morbimortalite	11002856	Wrong population, mean age not reported. Wrong intervention, only two trials deal with beta blocker mono therapy (in one arm).	2
143	Pahor 2000	Health outcomes associated with calcium antagonists compared with other first-line antihypertensive therapies: A meta-analysis of randomised controlled trials	11130522/10.1016/S0140-6736(00)03306-7	Wrong intervention/population, only one of the 9 included trials deals with beta blockers and had a mean age over 65 years.	2
144	Paran 2010	Cognitive function and antihypertensive treatment in the elderly: a 6-year follow-up study.	20019592	Wrong population, not all patients had hypertension.	ref check
145	Parker 2012	Comparative effectiveness of 2 beta-blockers in hypertensive patients	22928181	Wrong population, less than 80% > 65.	3B
146	Parsons 2016	The effect of antihypertensive treatment on the incidence of stroke and cognitive decline in the elderly: A meta-analysis	26919226	Other: results are duplicate of MRC (included).	3B
147	Pearce 1998	Cost-minimization and the number needed to treat in uncomplicated hypertension	9633802	Wrong topic, cost-minimization analysis. Wrong outcome, costs.	2
148	Petrovitch 1992	Isolated systolic hypertension: lowering the risk of stroke in older patients. SHEP Cooperative Research Group	1544585	Wrong intervention, main drug was chlorthalidone and the trial shows that low dose of these medications prevent strokes, coronary events, and combined cardiovascular disease events.	3A
149	Price 2011	Liver X receptor alpha gene polymorphisms and variable cardiovascular outcomes in patients treated with antihypertensive therapy: results from the INVEST-GENES study	PMCID: PMC3093636	Wrong population, no age group reported.	3B
150	Pringle 2003	Systolic blood pressure variability as a risk factor for stroke and cardiovascular mortality in the elderly hypertensive population. J Hypertens 2003; 21:2251–2257.	14654744	Wrong intervention: no beta blocker.	ref check
151	Prisant 2002	Should beta blockers be used in the treatment of hypertension in the elderly?	12147932	Wrong publication type, narrative review.	2
152	Quan 2009	Pharmacotherapy for hypertension in women of different races	10908526/10.1002/14651858.CD002146	Wrong intervention and population, general hypertension therapy and age ( >55 years).	1
153	Qui 2011	Antihypertensive efficacy and safety of benidipine and its effects on cardiac structure and function in elderly Chinese patients with mild to moderate hypertension: an open-label, long-term study	21528640	Wrong intervention.	3B
154	Ringoir 2014	Beta-blockers and depression in elderly hypertension patients in primary care	24911300	Wrong population, less than 80% > 65.	3B
155	Robertson 2013	Pharmacological treatment of vascular risk factors for reducing mortality and cardiovascular events in patients with abdominal aortic aneurysm	24449038/10.1002/14651858.CD010447.pub2	Wrong intervention, does not deal with beta blockers.	1
156	Ross2001	Discontinuation of antihypertensive drugs due to adverse events: a systematic review and meta-analysis	11718500	Wrong population, mean age <65 years (mean age 54,3).	1
157	Rothwell 2010	Effects of blockers and calcium-channel blockers on withinindividual variability in blood pressure and risk of stroke. Lancet Neurol 2010; 9:469–480.	20227347	Wrong outcome, no mean age for ASCOT-BPL.	ref check
158	Ruiz -Garcia 2000	Hypertension in the elderly and end-points in health with different pharmacological therapy. La hipertension en los ancianos y resultados globales en salud con distintas terapias farmacologicas		Wrong intervention/topic, not specific on the effect of beta blockers. Summary effect of different antihypertensive treatments.	2
159	Salles 2013	Prognostic significance of baseline heart rate and its interaction with beta-blocker use in resistant hypertension: a cohort study	23382406	Wrong population, less than 80% > 65.	3B
160	Salpeter 2011	Cardioselective beta-blockers for chronic obstructive pulmonary disease	12076486/10.1002/14651858.CD003566	Wrong intervention, does not deal with beta blockers.	1
161	Salpeter 2011	Cardioselective beta-blockers for reversible airway disease	12519582/10.1002/14651858.CD002992	Wrong outcome/intervention, improving adherence in reversible airway disease.	1
162	Sander 2011	Resistant hypertension: Concepts and approach to management	21922182	Wrong publication type, narrative interview.	3B
163	Sanderson S 1996	Hypertension in the elderly: pressure to treat?		Wrong intervention, meta-analysis on various drugs, 2 studies on beta blockers already included here Coope 1986 and MRC 1992.	3A
164	Scholz 2011	Medical treatment of hypertension in inpatients. Role of fixed dose combinations	-	Wrong topic, wrong population, wrong S.	3B
165	Sever 2012	Is plasma renin activity a biomarker for the prediction of renal and cardiovascular outcomes in treated hypertensive patients? Observations from the Anglo-Scandinavian Cardiac Outcomes Trial (ASCOT)	22942337	Wrong population, less than 80% > 65.	3B
166	Shah 2009	Does use of antihypertensive drugs affect the incidence or progression of dementia? A systematic review	19948301/10.1016/j.amjopharm.2009.11.001	Wrong intervention/topic, summary effect of different antihypertensives drugs.	2
167	Shah 2011	Does beta-adrenoceptor blocker therapy improve cancer survival? Findings from a population-based retrospective cohort study	PMCID: PMC3141198	Wrong population, no age group reported.	3B
168	Simons- Morton 1993	Hypertension treatment trials and stroke occurrence revisited. A quantitative overview	8167837	Wrong intervention/population, not beta blocker specific and age criteria not fulfield. Wrong publication type, narrative review.	2
169	So 2012	Usefulness of beta-blocker therapy and outcomes in patients with pulmonary arterial hypertension	22385756	Wrong topic, pulmonary hypertension excluded by Anna V	3B
170	Staessen 2000	Risks of untreated and treated isolated systolic hypertension in the elderly: Meta-analysis of outcome trials	10752701	Wrong intervention/population, not beta blocker specific and age criteria not fulfield.	2
171	Staessen 2001	Cardiovascular protection and blood pressure reduction: A meta-analysis	11684211/10.1016/S0140-6736(01)06411-X	Wrong intervention/population, not beta blocker specific and age criteria not fulfield. Only 1 of the 9 included trials deals with beta blockers and had a mean age > 65 years.	2
172	Stason 2007	Safety of nifedipine in patients with hypertension: a meta-analysis	9231814	Wrong intervention/topic, no relevant data about beta blocker.	1
173	Stefan 2012	Association between beta-blocker therapy and outcomes in patients hospitalised with acute exacerbations of chronic obstructive lung disease with underlying ischaemic heart disease, heart failure or hypertension	22941975	Wrong population, not all had hypertension, no subgroup for hypertension.	3B
174	Stienen 1992	Hemodynamic and metabolic effects of carvedilol: A meta-analysis approach	1350487	Wrong outcome, dose- response.	2
175	The Swedish Council on Technology Assessment in Health Care 1995	Moderately elevated blood pressure. A report from SBU, the Swedish Council on Technology Assessment in Health Care.	9422043	Wrong intervention, antihypertensive treatment in general. Only summarized results for antihypertensives. Wrong population, mean age <65 years (no subgroups on beta blocker analysed). (subgroup) analysis including our target population and intervention (beta blocker).	1
176	Thijis 1992	A meta-analysis of outcome trials in elderly hypertensives	1334990	Wrong intervention/population, not beta blocker specific and age >60 years. Only summarized effect of antihypertensives.	2
177	Thompson 2011	Antihypertensive treatment and secondary prevention of cardiovascular disease events among persons without hypertension: a meta-analysis	21364140/4313888/10.1001/jama.2011.250	Wrong population, patients without hypertension.	1
178	Thornley-Brown 2006	Differing effects of antihypertensive drugs on the incidence of diabetes mellitus among patients with hypertensive kidney disease. Arch Intern Med 2006; 166:797–805.	16606818	Wrong population, mean age <65 years.	3A
179	Toblli 2012	Nebivolol: impact on cardiac and endothelial function and clinical utility	22454559/3310359/10.2147/VHRM.S20669	Wrong publication type, narrative review.	2
180	Tomas 2016	Patterns of prescription antihypertensive drug utilization and adherence to treatment guidelines in the city of Novi Sad	27498444	Wrong topic.	3B
181	Torp-Pedersen 2002	The incomplete Bucindolol Evaluation in Acute myocardial infarction Trial (BEAT). Eur J Heart Fail 2002;4:495-9	12167390	Wrong population, patients without hypertension.	3A
182	Turnbull 2003	Effects of different blood-pressure-lowering regimens on major cardiovascular events: results of prospectively-designed overviews of randomised trials	14615107	Wrong population, mean age <65 years. Wrong intervention, not dealing with beta blocker.	1
183	Turnbull 2008	Effects of different regimens to lower blood pressure on major cardiovascular events in older and younger adults: meta-analysis of randomised trials. BMJ. 2008 May 17;336(7653):1121-3.	18480116	Wrong intervention: beta blocker + other hypertensive drugs, no clear results for beta blocker.	ref check
184	Umemoto 2013	Effects of a benidipine-based combination therapy on the risk of stroke according to stroke subtype: the COPE trial	23985703	Wrong population, less than 80% > 65.	3B
185	Verdecchia 2007	Beta-blockers and arterial hypertension. Evidence-based medicine or excessive perseverance?	17972424	Wrong publication type, report.	2
186	Verdecchia 2009	Blood pressure reduction and renin-angiotensin system inhibition for prevention of congestive heart failure: a meta-analysis	19168534/10.1093/eurheartj/ehn575	Wrong population, mean age <65 years (age not stated).	1
187	Wagner 2012	Antihypertensive treatment and risk of dementia: A retrospective database study	22373832	Wrong population: not all patients had hypertension.	3B
188	Wang 2001	Benefits of antihypertensive drug treatment in elderly patients with isolated systolic hypertension. Neth J Med 2001; 58: 248–254	11395222	Wrong publication type, no systematic review.	ref check
189	Wang 2006	Carotid intima-media thickness and antihypertensive treatment: a meta-analysis of randomized controlled trials	16763185/10.1161/01.STR.0000227223.90239.13	Wrong population, no subgroup analysis for our age target population.	1
190	Webb 2010	Effects of antihypertensive-drug class on interindividual variation in blood pressure and risk of stroke: a systematic review and meta-analysis. Lancet 2010; 375: 906–915	20226989	Wrong outcome.	ref check
191	Webb 2011	Effects of beta-blocker selectivity on blood pressure variability and stroke: a systematic review	21795649/10.1212/WNL.0b013e31822b007a	Wrong population, mean age <65 years. No data about the included studies.	2
192	Weber 2003	Outcomes of treating hypertension in the elderly: a short commentary on current issues	12502910	Wrong publication type, commentary.	2
193	Wei 2013	Effects of Intensive Antihypertensive Treatment on Chinese Hypertensive Patients Older Than 70 Years	23730991	Wrong intervention.	3B
194	Weiss 2013	Placebo effect and efficacy of nebivolol in patients with hypertension not controlled with lisinopril or losartan: A phase IV, randomized, placebo-controlled trial	23519546	Wrong population, less than 80% > 65.	3B
195	Wikstrand 1990	Primary prevention with beta-blockade in patients with hypertension: review of results and clinical implications	11527139	Wrong publication type, narrative review.	2
196	Wiysonge 2012	Beta-blockers for hypertension	22895924/10.1002/14651858.CD002003.pub3	Wrong population, only 3 of the 13 includes trials show a mean age > 65 years. No subgroup analysis including our target population and intervention (beta blocker).	1
197	Wong 2013	Predictors of the incidence of all-cause mortality and deaths due to diabetes and renal diseases among patients newly prescribed antihypertensive agents: A cohort study	23931979	Wrong population, less than 80% > 65.	3B
198	Wong 2014a	Blood pressure lowering efﬁcacy of nonselective beta-blockers for primary hypertension (Review).	24585007/10.1002/14651858.CD007452.pub2	Wrong outcome: blood preasure lowering.	Update (S1+2)
199	Wong 2014b	Blood pressure lowering efﬁcacy of partial agonist beta blocker monotherapy for primary hypertension (Review)	25427719/10.1002/14651858.CD007450.pub2	Wrong population, no subgroup analysis for our age group.	Update (S1+2)
200	Wong 2015	Blood pressure lowering efﬁcacy of dual alpha and beta blockers for primary hypertension (Review).	26306578/10.1002/14651858.CD007449.pub2	Wrong population, no subgroup analysis for our age group.	Update (S1+2)
201	Wright 1999	Systematic review of antihypertensive therapies: does the evidence assist in choosing a first-line drug	8.45406	Wrong population/intervention, no (subgroup) analysis including our target population and intervention (beta blockers).	1
202	Wright 2009	First-line drugs for hypertension	19588327/10.1002/14651858.CD001841.pub2	Wrong population, mean age <65 years.	1
203	Wu 2008	Time course for blood pressure lowering of dual alpha and beta blockers		Wrong publication type, protocol.	1
204	Xu 2012	Antihypertensive effects and safety of eprosartan: a meta-analysis of randomized controlled trials. European Journal of Clinical Pharmacology	21881888/10.1007/s00228-011-1107-3	Wrong intervention, study comparing eposartan with atenolol. Wrong population, age not stated.	1
205	Xu 2013	Impact of a Better Persistence with Antihypertensive Agents on Ischemic Stroke Outcomes for Secondary Prevention	23730991	Wrong intervention.	3B
206	Xue 2015	First-line drugs inhibiting the renin angiotensin system versus other ﬁrst-line antihypertensive drug classes for hypertension (Review).	25577154/10.1002/14651858.CD008170.pub2	Wrong population, mean age <65 years, analysis on RAS Inh vs beta blocker not our age target.	Update (S1+2)
207	Zaiken 2013	A Review of the Use of Angiotensin Receptor Blockers for the Prevention of Cardiovascular Events in Patients with Essential Hypertension Without Compelling Indications.	23585649/10.1345/aph.1R273	Wrong publication type, narrative review. Wrong intervention, treatment mixed.	Update (S1+2)
208	Zang 2013	Antihypertensive drugs and the risk of fall injuries: A systematic review and meta-analysis.	24051019/10.1177/0300060513497562	Wrong intervention, not beta blocker specific. Wrong population, mean age <65 years.	Update (S1+2)
209	Zarnke 2003	Recent developments in the assessment and management of hypertension: CHEP, ALLHAT and LIFE		Wrong publication type, narrative review (report).	2
